# Supplementary material
Source: Elsevier journal article supplement (https://www.sciencedirect.com/science/article/pii/S2530064417301062)
Supplement: mmc1 [file S2530064417301062:mmc1.docx]

Annex 1. Selected list of experts consulted during the planning phase for each species reintroduction.

**Giant anteater**

Mariella Superina

Flavia Miranda

Flavio Rodrigues

Guillermo Pérez Gimeno

Marcela Uhart

**Pampas deer**

Mario Beade

Marcela Uhart

Fernando Miñarro

Alejandro Vila

José Mauricio Barbanti Duarte

**Collared peccary**

Mariana Altrichter

Harald Back

**Tapir**

Patricia Medici

Harald Back

Soledad de Bustos

Silvia Chalukian

**Green-winged macaw**

Igor Berkunsky

James Gilardi

Alejandro Di Giacomo

Fabián Marcelo Gabelli

**Jaguar**

Mario Di Bitteti

Agustín Paviolo

Carlos de Angelo

Yamil di Blanco

Jeremy Anderson

George Schaller

Ronaldo Morato

Peter Crawshaw

Wanderley de Moraes

Les Carlisle
